# Supplementary material for: Wildfire switches the typical understanding of boreal peatland methane emissions
Source: Copernicus journal article supplement (doi:10.5194/bg-2019-139), 2019-05-09
Supplement: Supplementary file 1 [file bg-2019-139-supplement.pdf]

1 **Supplementary information**

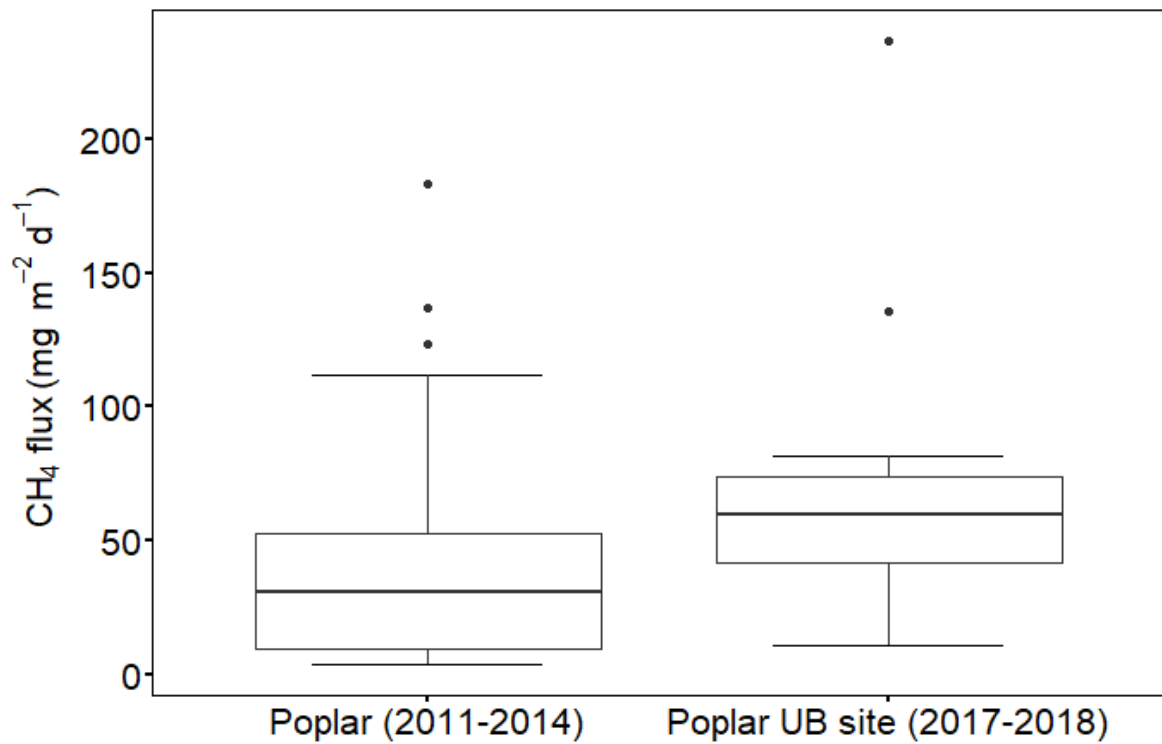

2

3 **Figure S1. Comparison of CH<sub>4</sub> flux between a study conducted at Poplar Fen (2011-2014; Murray**  
4 ***et al.*, 2017) and this study (UB site only)**

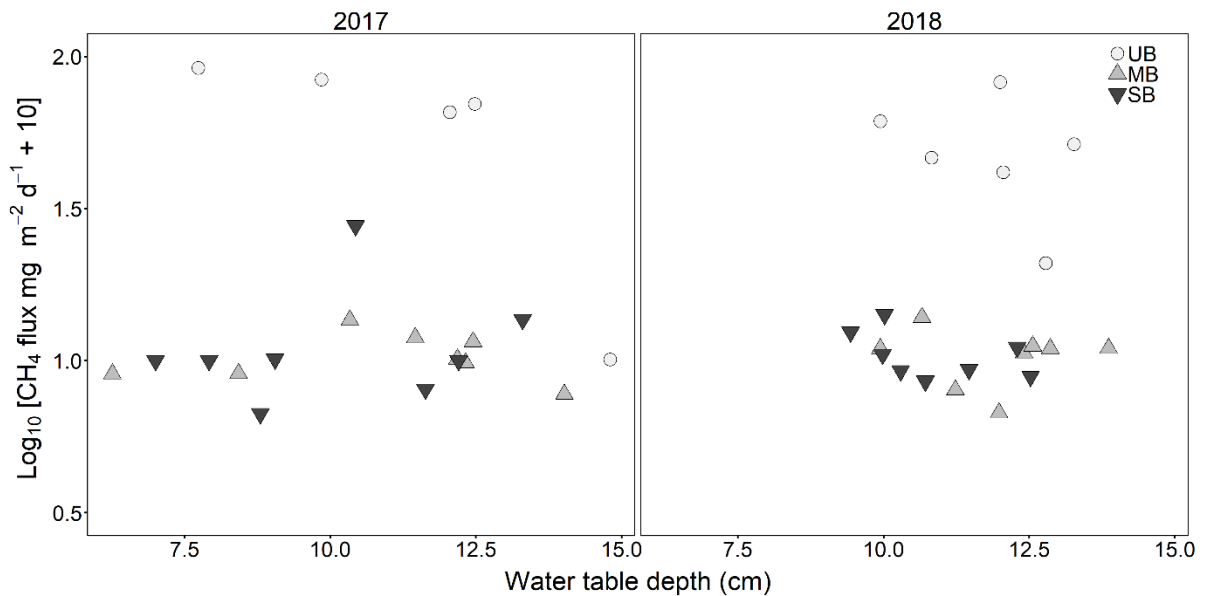

5

6 **Figure S2. Seasonal mean CH<sub>4</sub> flux (log transformed) at each collar across the burn severity**  
7 **gradient plotted against seasonal mean ST at 30 cm depth. UB is unburned, MB is moderately**  
8 **burned and SB is severely burned. Note that CH<sub>4</sub> values were log transformed + 10 therefore a**  
9 **value of 1 represents the measured value zero.**

10

**Table S1. Mean (standard deviation) gravimetric water content (%) and organic matter content by LOI (%) for each microform type across the burn severity gradient**

| Burn severity | Microform | Gravimetric water content (%) | Organic matter content (%) |
|---------------|-----------|-------------------------------|----------------------------|
| UB            | Hollow    | 84.8 (10.3)                   | 89.3 (3.3)                 |
|               | Hummock   | 83.5 (12.1)                   | 89.0 (2.3)                 |
| MB            | Hollow    | 77.5 (3.9)                    | 82.2 (1.9)                 |
|               | Hummock   | 83.2 (8.0)                    | 90.9 (2.7)                 |
| SB            | Hollow    | 88.4 (2.5)                    | 87.7 (2.8)                 |
|               | Hummock   | 89.6 (2.4)                    | 92.2 (2.9)                 |

11

12
